# Supplementary material for: Replication and Genetic Risk Score Analysis for Pancreatic Cancer in a Diverse Multiethnic Population
Source: Oxford University Press journal article supplement (doi:10.1158/1055-9965.epi-20-0963), 2020-09-21
Supplement: 10559965epi200963-sup-245832_2_supp_6565527_qggw42.docx [file 10559965epi200963-sup-245832_2_supp_6565527_qggw42.docx]

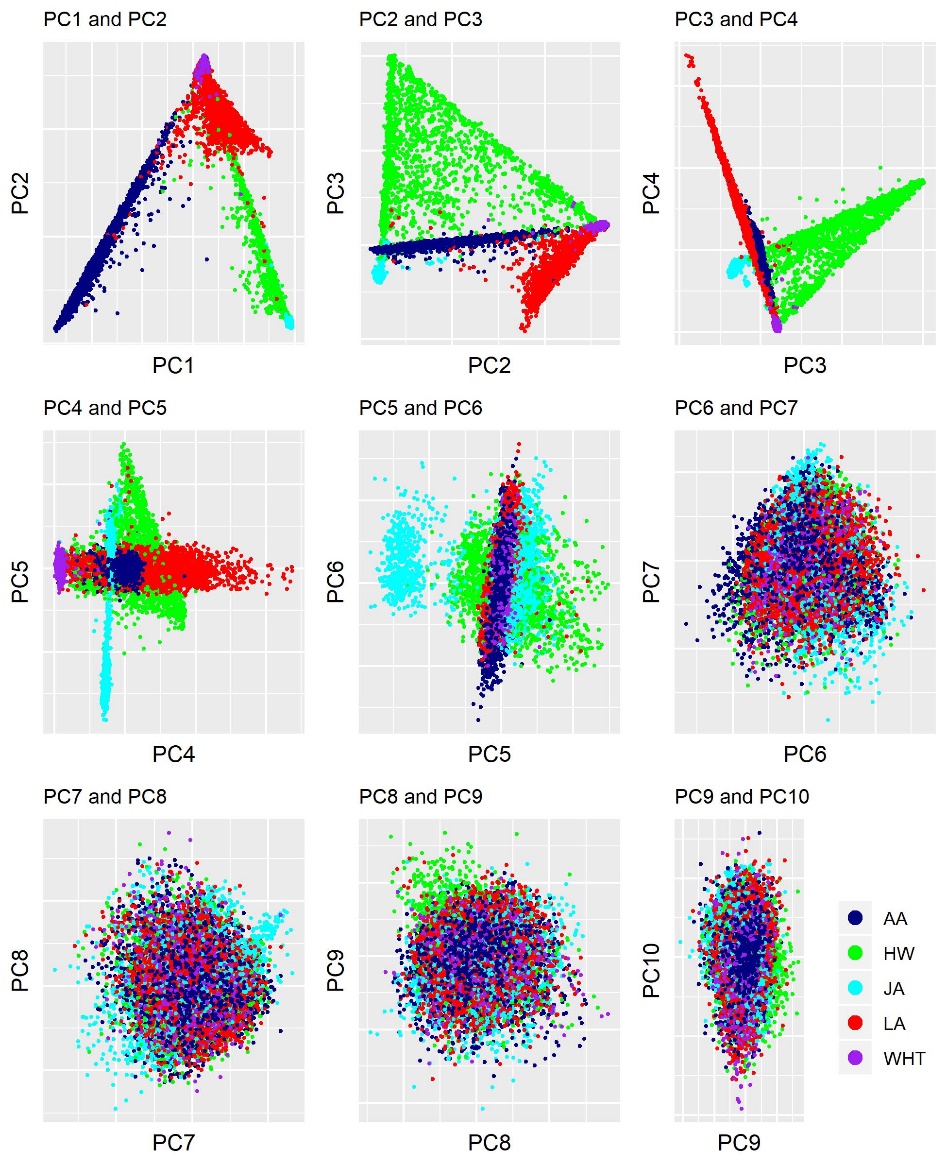


**Supplementary Figure 3.** Principal component (PC) analysis plots with point color corresponding to self-reported race/ethnicity from baseline questionnaires.
