# Supplementary material for: Replication and Genetic Risk Score Analysis for Pancreatic Cancer in a Diverse Multiethnic Population
Source: Oxford University Press journal article supplement (doi:10.1158/1055-9965.epi-20-0963), 2020-09-21
Supplement: 10559965epi200963-sup-245832_2_supp_6565528_qggw42.docx [file 10559965epi200963-sup-245832_2_supp_6565528_qggw42.docx]

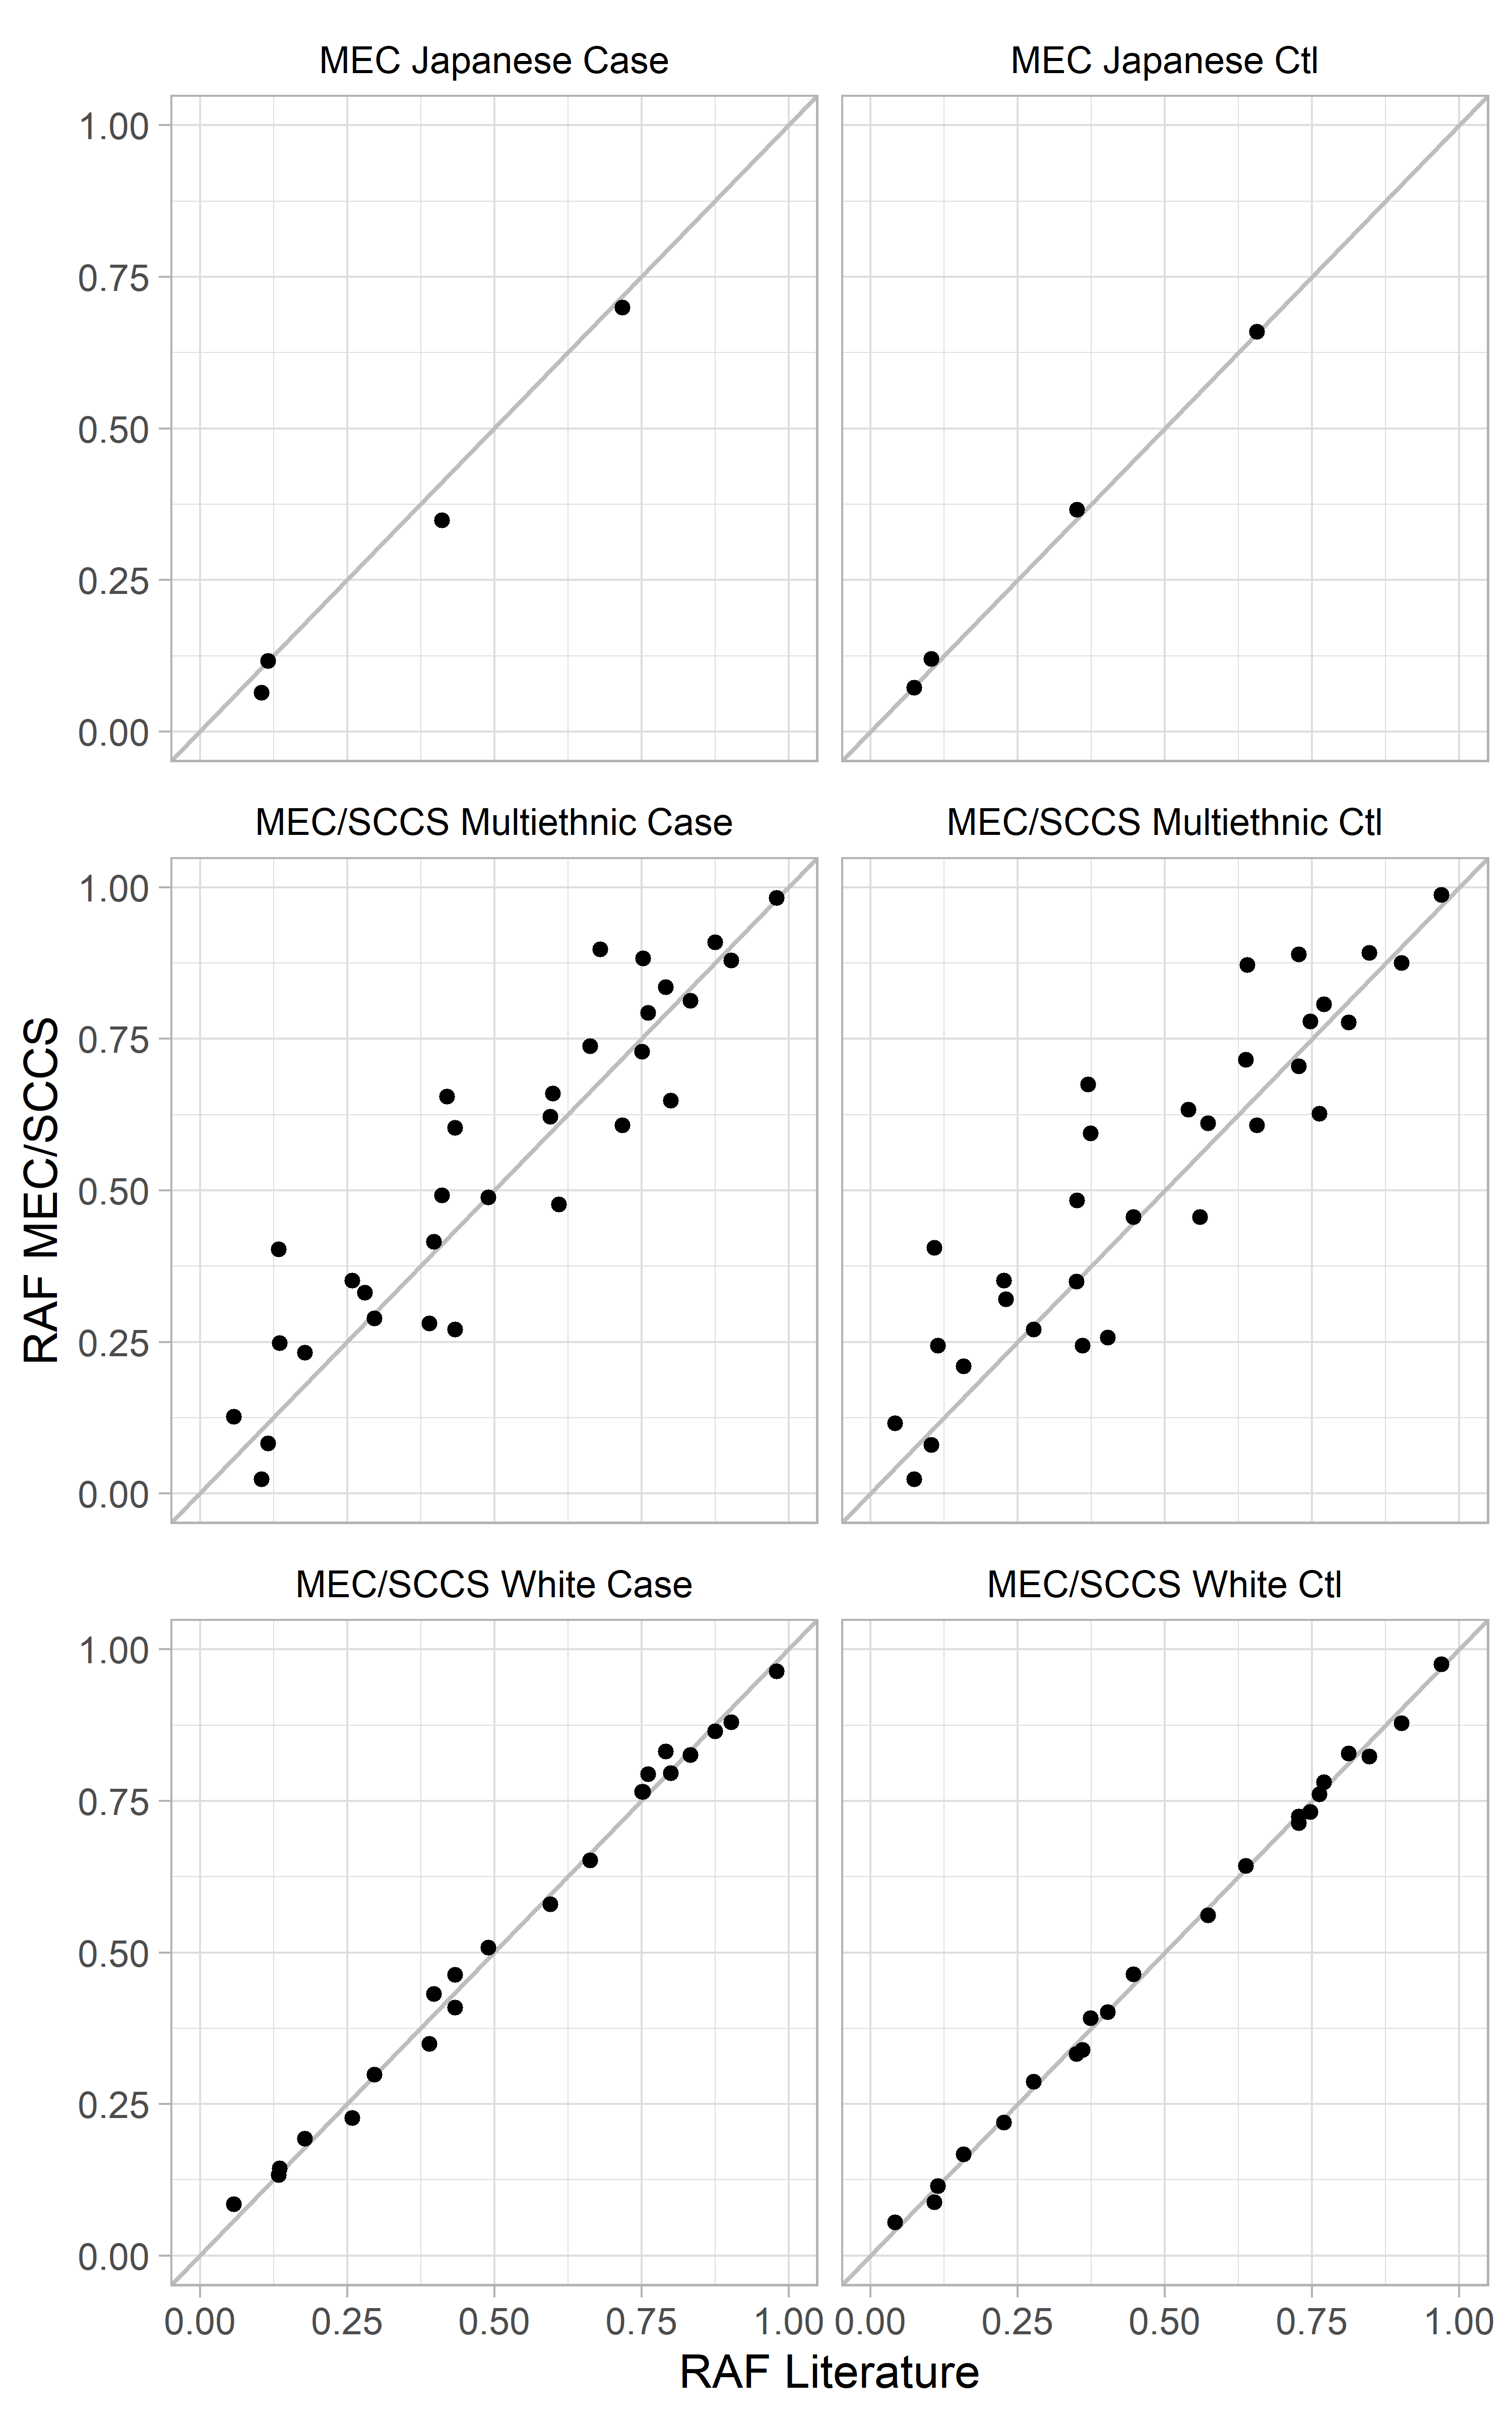


**Supplementary Figure 4.** Comparison of risk allele frequencies (RAFs) within the Multiethnic Cohort (MEC) and Southern Community Cohort Study (SCCS) with the reported RAF from the most recent GWAS results reported in the literature.
