# Supplementary material for: Replication and Genetic Risk Score Analysis for Pancreatic Cancer in a Diverse Multiethnic Population
Source: Oxford University Press journal article supplement (doi:10.1158/1055-9965.epi-20-0963), 2020-09-21
Supplement: 10559965epi200963-sup-245832_2_supp_6565529_qggw42.docx [file 10559965epi200963-sup-245832_2_supp_6565529_qggw42.docx]

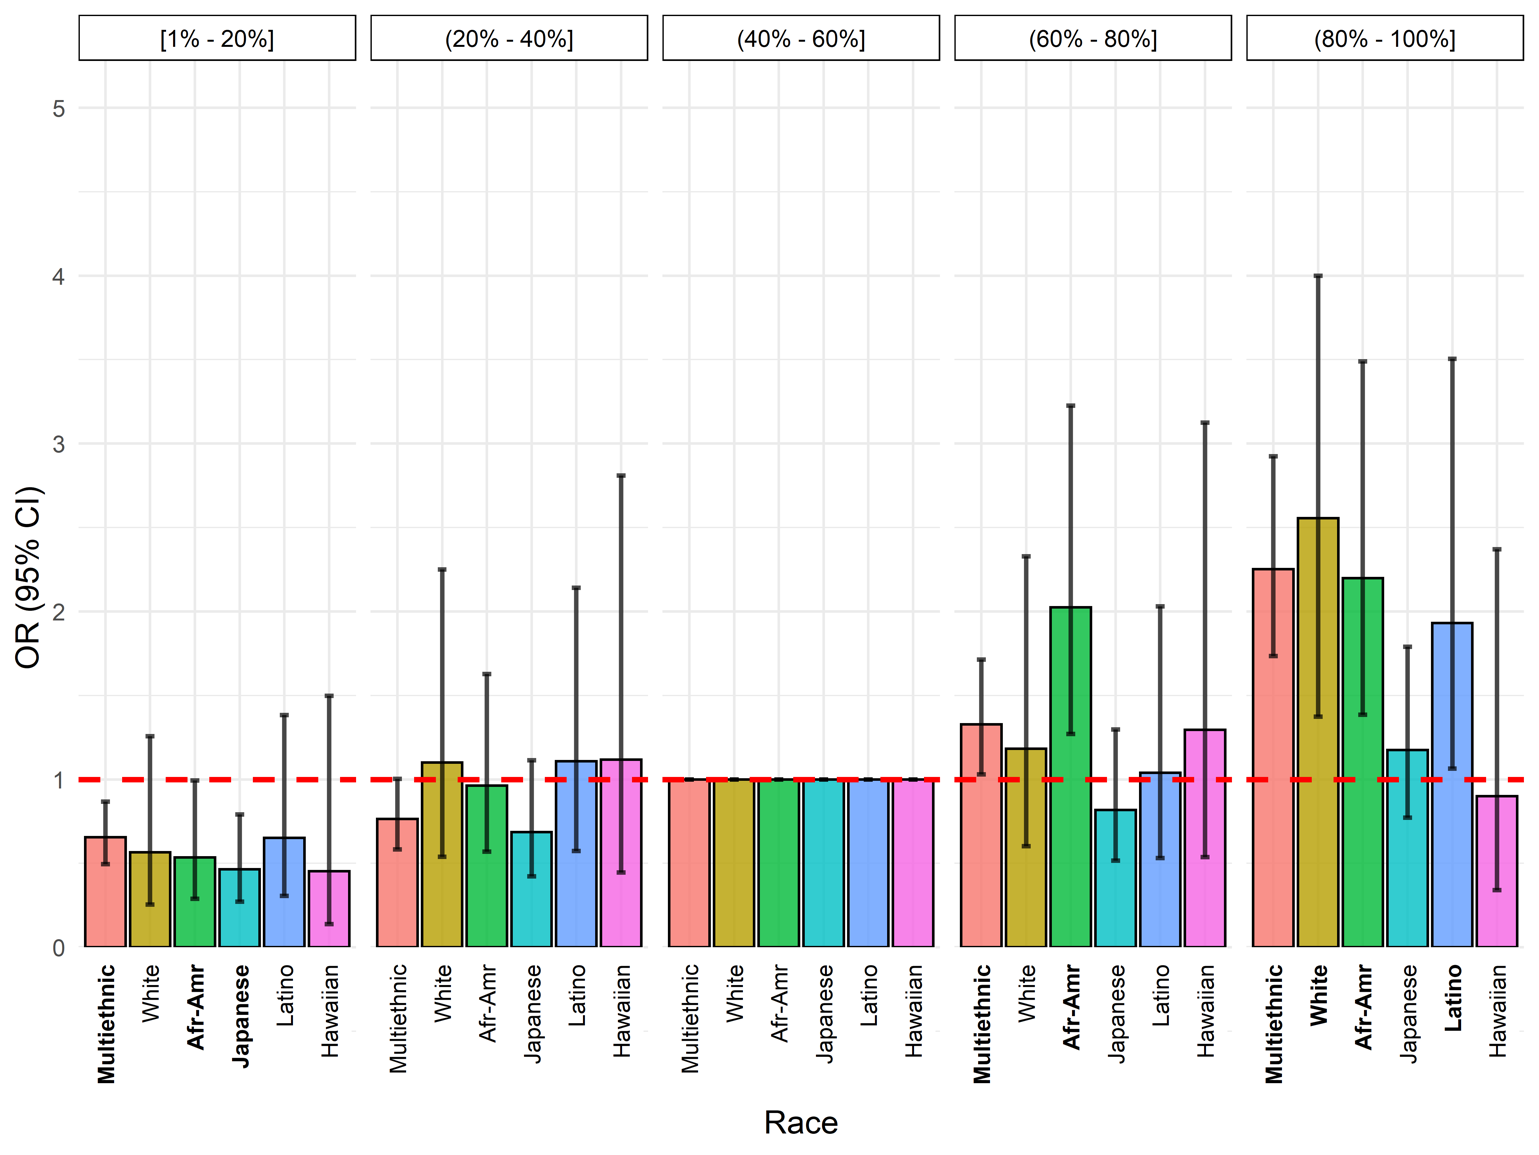


**Supplementary Figure 5**. Multiethnic and ethnic-specific polygenic risk score odds ratios (ORs) and 95% confidence intervals (CIs). Weights used from multiethnic replication analysis. Multiethnic analysis used binned risk score percentile groups from the complete, multiethnic, sample among controls. Ethnic-specific analysis used binned risk score percentile groups from the control ethnic-specific risk score distribution among controls. Bolded race labels correspond to p values from likelihood ratios tests with p < 0.05.
