# Supplementary material for: Replication and Genetic Risk Score Analysis for Pancreatic Cancer in a Diverse Multiethnic Population
Source: Oxford University Press journal article supplement (doi:10.1158/1055-9965.epi-20-0963), 2020-09-21
Supplement: 10559965epi200963-sup-245832_2_supp_6565535_qggw42.docx [file 10559965epi200963-sup-245832_2_supp_6565535_qggw42.docx]

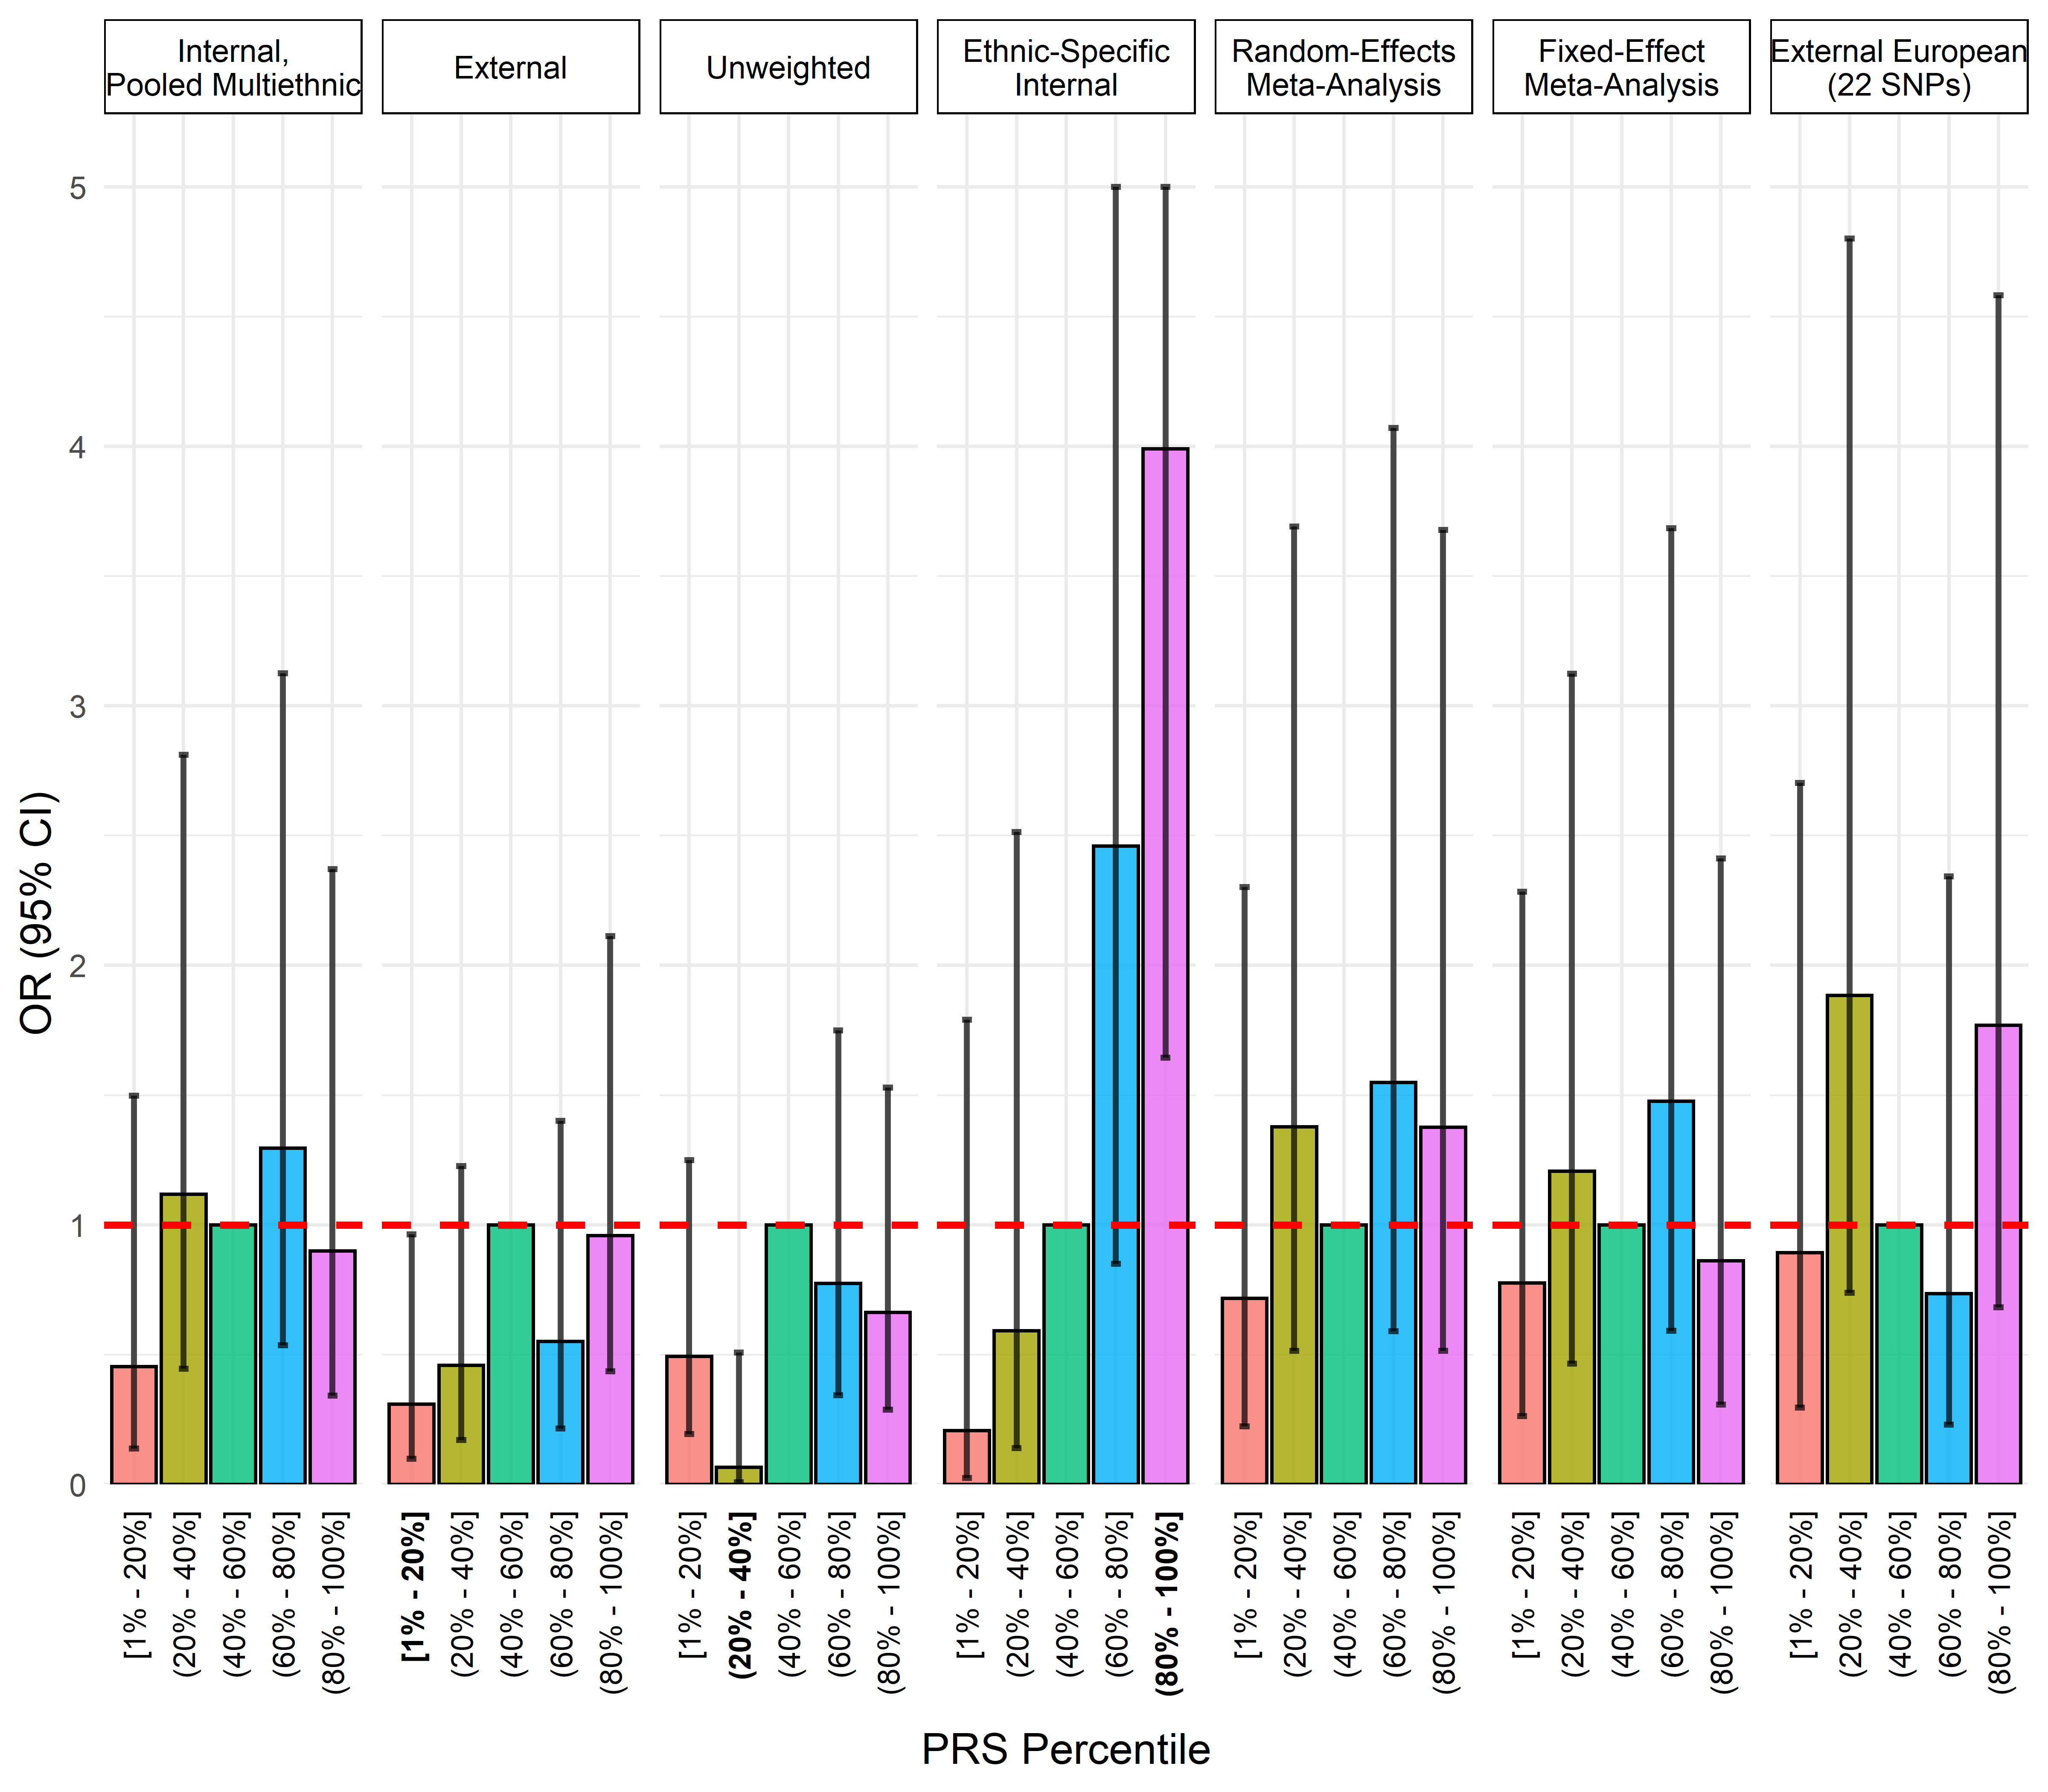


**Supplementary Figure 11.** Comparison of polygenic risk score calculation methods in the Native Hawaiian analysis. In ethnic-specific internal scores, if SNP MAF < 0.05, the multiethnic weight was used to avoid unstable scores.
